# Supplementary material for: Neonatal Death and Heart Failure in Mouse with Transgenic HSP60 Expression
Source: Hindawi journal article supplement (doi:10.1155/2015/539805), 2015-01-01

Figure S1

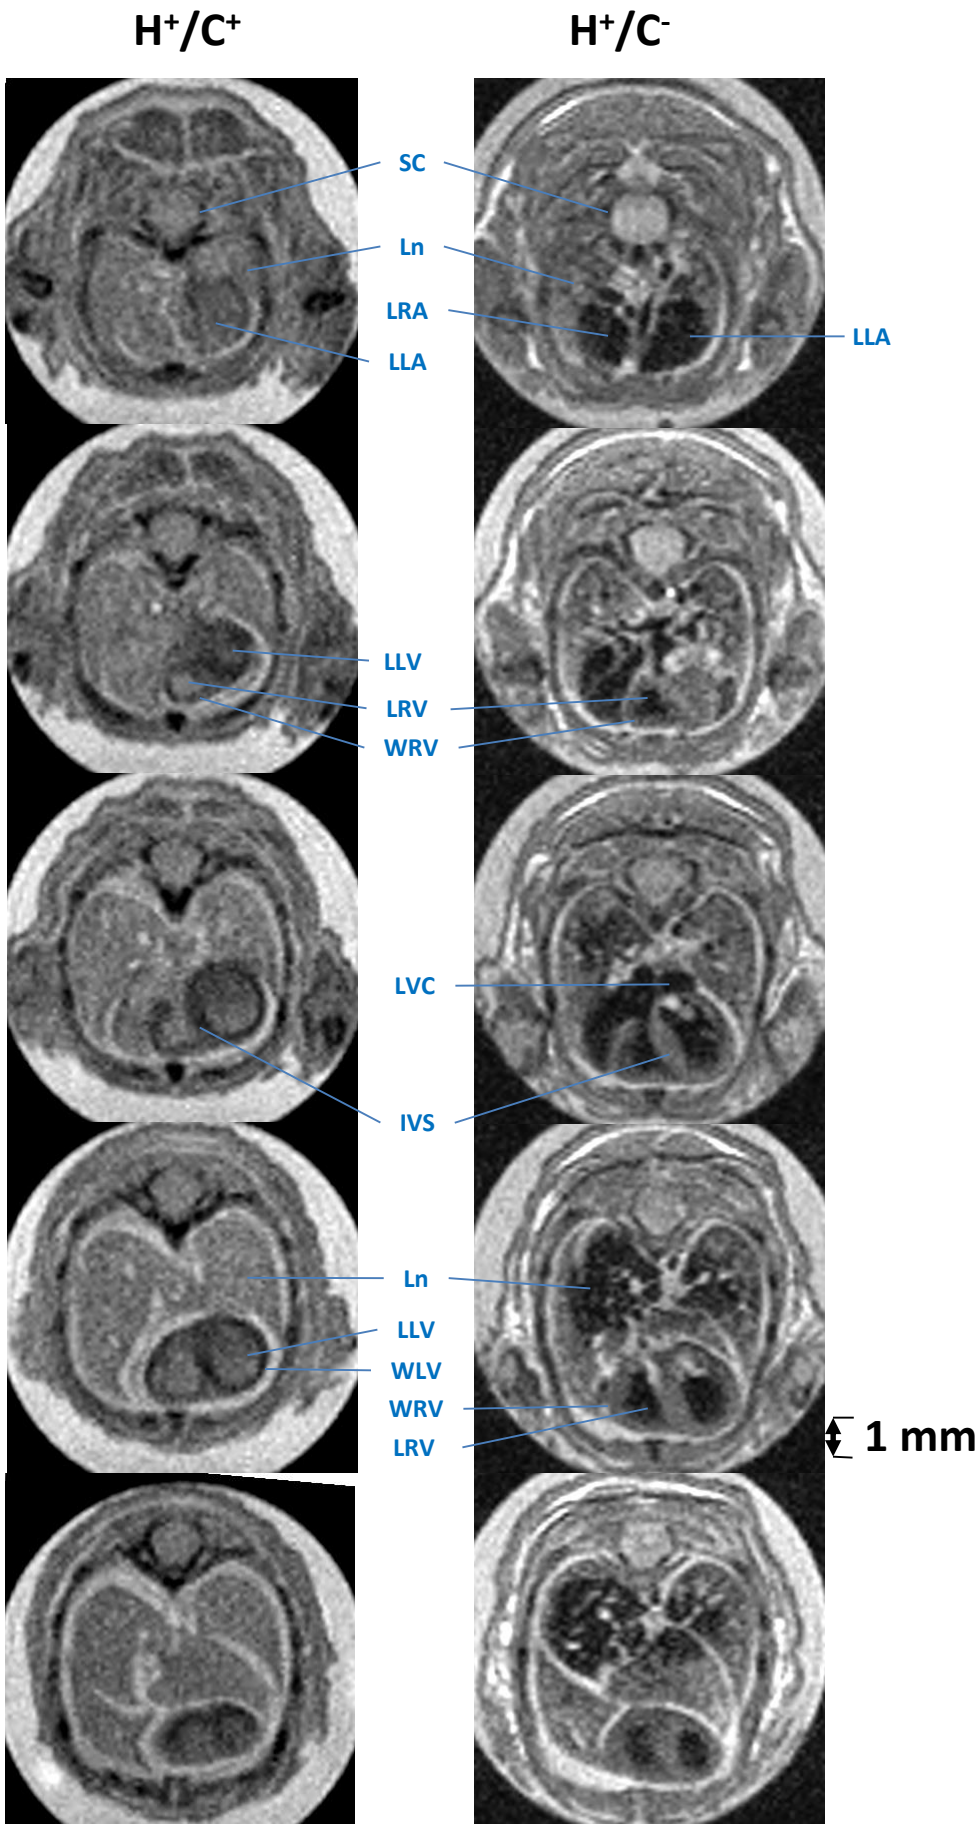

**Figure S2**

**A**

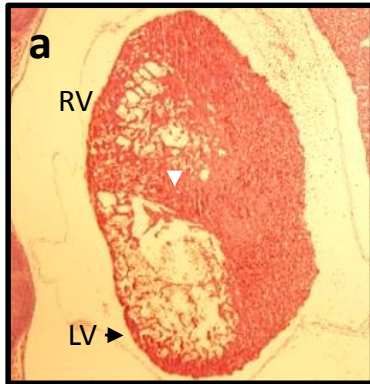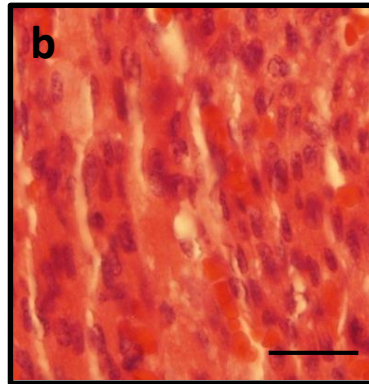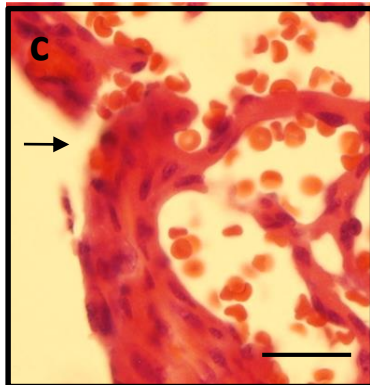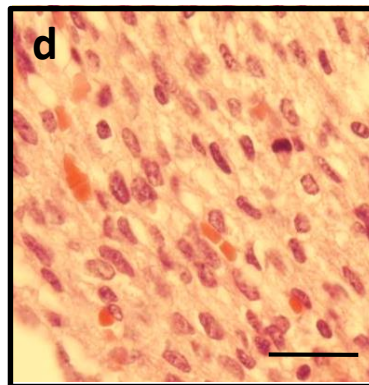

**B**

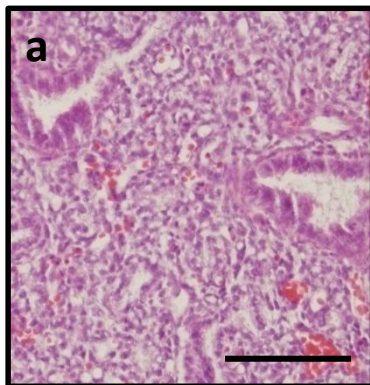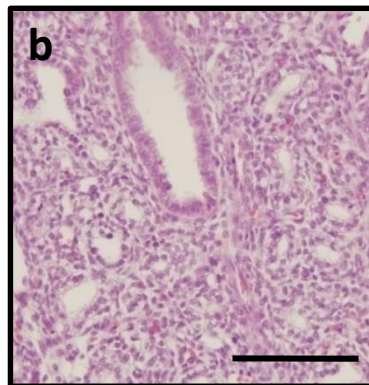

**Figure S3**

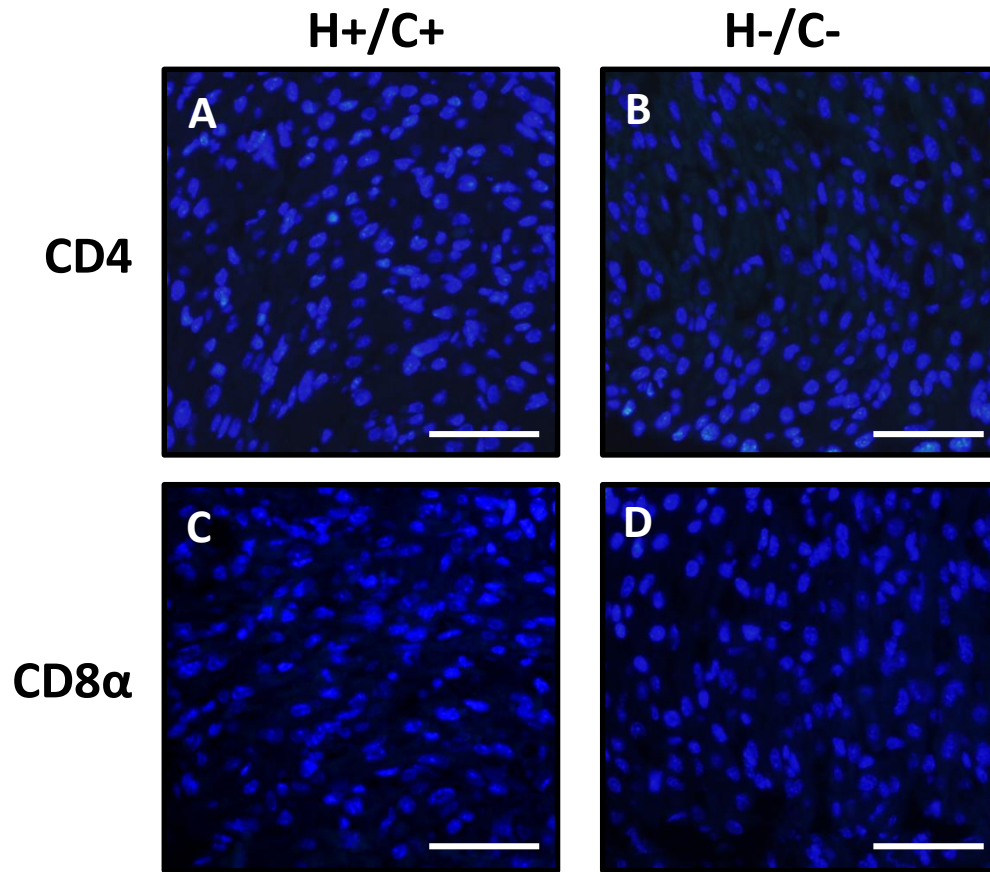

Supplement: f1 [file 539805.f1.pdf]
